# Supplementary material
Source: publisher figshare collection journal article supplement (https://sage.figshare.com/ndownloader/files/14033363)
Supplement: Supplementary file 1 [file 14033363]

# Subtopic report survey

This is a form to ease the peer-review process. Its details can be found on the course's syllabus, please contact me by e-mail if you have any doubt. This means is used equally for all reports' evaluation and it is based on the guide to write technical reports (provided previously) and on the rubric. The peer-review process demands a highly ethical behavior and as such, it implies that a fraudulent or arbitrary grade assignation will be punished. Please try to be objective and always remember that any grade is a percentage measurement of what has been done, not of what has been tried to achieve.

\* Required

1. I am aware of the etical implications of grading my classmates work, the proper way to do so, and the consequences of fraudulent or arbitrary grading assignation (stipulated on the syllabus) \*

Mark only one oval.

☐ Yes

2. Grader ID \*

---

3. Which is the ID of the document to be graded

\*

---

4. Please read the title, the abstract, and the conclusions \*

Mark only one oval.

|                                 | 0                     | 1                     | 2                     | 3                     | 4                     | 5                     | 6                     | 7                     | 8                     | 9                     | 10                    |                               |
|---------------------------------|-----------------------|-----------------------|-----------------------|-----------------------|-----------------------|-----------------------|-----------------------|-----------------------|-----------------------|-----------------------|-----------------------|-------------------------------|
| It seems like a very bad report | <input type="radio"/> | I look forward to read it all |

## Abstract

5. Problem statement \*

Mark only one oval.

|                                             | 0                     | 1                     | 2                     | 3                     | 4                     | 5                     |                                                     |
|---------------------------------------------|-----------------------|-----------------------|-----------------------|-----------------------|-----------------------|-----------------------|-----------------------------------------------------|
| There is none or it is not really a problem | <input type="radio"/> | The problem statement goes beyond the assigned task |

**6. Problem justification \***

*Mark only one oval.*

|                                                | 0                     | 1                     | 2                     | 3                     | 4                     | 5                     |                                                |
|------------------------------------------------|-----------------------|-----------------------|-----------------------|-----------------------|-----------------------|-----------------------|------------------------------------------------|
| There is no justification or it is unimportant | <input type="radio"/> | It is clear why they want to solve the problem |

**7. How has the problem been solved? \***

*Mark only one oval.*

|                                           | 0                     | 1                     | 2                     | 3                     | 4                     | 5                     |                                                                                                                        |
|-------------------------------------------|-----------------------|-----------------------|-----------------------|-----------------------|-----------------------|-----------------------|------------------------------------------------------------------------------------------------------------------------|
| There is no sight of the state of the art | <input type="radio"/> | It is clear how the problem is normally solved (or faced). It states why it is important to keep looking for solutions |

**8. Solution statement \***

*Mark only one oval.*

|                                                                 | 0                     | 1                     | 2                     | 3                     | 4                     | 5                     |                                                                                                                        |
|-----------------------------------------------------------------|-----------------------|-----------------------|-----------------------|-----------------------|-----------------------|-----------------------|------------------------------------------------------------------------------------------------------------------------|
| There is none or it is inconsistent with the rest of the report | <input type="radio"/> | It is clear what has been done and some remarkable results are mentioned. They are totally related with the objectives |

**9. My opinion about the abstract \***

*Mark only one oval.*

|                              | 0                     | 1                     | 2                     | 3                     | 4                     | 5                     | 6                     | 7                     | 8                     | 9                     | 10                    |                                                        |
|------------------------------|-----------------------|-----------------------|-----------------------|-----------------------|-----------------------|-----------------------|-----------------------|-----------------------|-----------------------|-----------------------|-----------------------|--------------------------------------------------------|
| I think it is a bad abstract | <input type="radio"/> | Considering this abstract, the report should be great! |

## Introduction

**10. Problem statement \***

*Mark only one oval.*

|                                                                      | 0                     | 1                     | 2                     | 3                     | 4                     | 5                     |                                                                                              |
|----------------------------------------------------------------------|-----------------------|-----------------------|-----------------------|-----------------------|-----------------------|-----------------------|----------------------------------------------------------------------------------------------|
| There is no coherence and a relation with the report seems difficult | <input type="radio"/> | The problem is explained thoroughly and its focus is congruent with the report's perspective |

**11. Problem justification \***

*Mark only one oval.*

|                                             | 0                     | 1                     | 2                     | 3                     | 4                     | 5                     |                                                                                                 |
|---------------------------------------------|-----------------------|-----------------------|-----------------------|-----------------------|-----------------------|-----------------------|-------------------------------------------------------------------------------------------------|
| It is actually hard to find a justification | <input type="radio"/> | The problem resolution is clearly necessary and it is linked with the type of proposed solution |

**12. How has the problem been solved? \***

*Mark only one oval.*

|                      | 0                     | 1                     | 2                     | 3                     | 4                     | 5                     |                                                                                                  |
|----------------------|-----------------------|-----------------------|-----------------------|-----------------------|-----------------------|-----------------------|--------------------------------------------------------------------------------------------------|
| Barely/Not mentioned | <input type="radio"/> | An explanation of previous solutions is provided - They are also related to the present proposal |

**13. Solution statement \***

*Mark only one oval.*

|                                                                                                    | 0                     | 1                     | 2                     | 3                     | 4                     | 5                     |                                                                                                                                         |
|----------------------------------------------------------------------------------------------------|-----------------------|-----------------------|-----------------------|-----------------------|-----------------------|-----------------------|-----------------------------------------------------------------------------------------------------------------------------------------|
| There is none - The explanation of what has been done is partial. The reason to do so is not clear | <input type="radio"/> | It is explained what has been done and why. The solution is given with respect to the objectives and other solutions (state of the art) |

## Methodology

**14. Description of the solution \***

*Mark only one oval.*

|                                                                                                                                                    | 0                     | 1                     | 2                     | 3                     | 4                     | 5                     |                                                                         |
|----------------------------------------------------------------------------------------------------------------------------------------------------|-----------------------|-----------------------|-----------------------|-----------------------|-----------------------|-----------------------|-------------------------------------------------------------------------|
| There is none - The used methods, experiments, or solution proposal are poorly described. They actually make it difficult to understand the report | <input type="radio"/> | The used methods, experiments, or solution proposal are fully described |

15. **Validity** \*

Mark only one oval.

|                                                                          |                       |                       |                       |                       |                       |                       |                                                                  |
|--------------------------------------------------------------------------|-----------------------|-----------------------|-----------------------|-----------------------|-----------------------|-----------------------|------------------------------------------------------------------|
|                                                                          | 0                     | 1                     | 2                     | 3                     | 4                     | 5                     |                                                                  |
| There is none - The proposed solution is barely related with the problem | <input type="radio"/> | The proposed solution is enough to clearly attain the objectives |

16. **Complexity** \*

Mark only one oval.

|                                                                                                             |                       |                       |                       |                       |                       |                       |                                                                           |
|-------------------------------------------------------------------------------------------------------------|-----------------------|-----------------------|-----------------------|-----------------------|-----------------------|-----------------------|---------------------------------------------------------------------------|
|                                                                                                             | 0                     | 1                     | 2                     | 3                     | 4                     | 5                     |                                                                           |
| The proposed solution is simplistic, it will work only for particular cases, or it is unnecessarily complex | <input type="radio"/> | The proposed solution is general, modular, verifiable, complete, concrete |

17. **My opinion about the methodology** \*

Mark only one oval.

|                                                              |                       |                       |                       |                       |                       |                       |                       |                       |                       |                       |                       |                                                          |
|--------------------------------------------------------------|-----------------------|-----------------------|-----------------------|-----------------------|-----------------------|-----------------------|-----------------------|-----------------------|-----------------------|-----------------------|-----------------------|----------------------------------------------------------|
|                                                              | 0                     | 1                     | 2                     | 3                     | 4                     | 5                     | 6                     | 7                     | 8                     | 9                     | 10                    |                                                          |
| This is wrong! It won't provide any means to find a solution | <input type="radio"/> | I really think this proposal will help solve the problem |

Results and Analysis

18. **Appearance** \*

Mark only one oval.

|                                       |                       |                       |                       |                       |                       |                       |                                                                                   |
|---------------------------------------|-----------------------|-----------------------|-----------------------|-----------------------|-----------------------|-----------------------|-----------------------------------------------------------------------------------|
|                                       | 0                     | 1                     | 2                     | 3                     | 4                     | 5                     |                                                                                   |
| Results are confusing and incongruent | <input type="radio"/> | All figures, tables, text, images, etc. are clear and match the required template |

### 19. Effectiveness \*

Mark only one oval.

|                                                            | 0                     | 1                     | 2                     | 3                     | 4                     | 5                     |                                                                                                                                      |
|------------------------------------------------------------|-----------------------|-----------------------|-----------------------|-----------------------|-----------------------|-----------------------|--------------------------------------------------------------------------------------------------------------------------------------|
| The results are presented through totally inadequate means | <input type="radio"/> | The way in which results are presented makes the analysis to be direct - The important information can be easily found by the reader |

### 20. Analysis \*

Mark only one oval.

|                                                                                                                  | 0                     | 1                     | 2                     | 3                     | 4                     | 5                     |                                                                                                             |
|------------------------------------------------------------------------------------------------------------------|-----------------------|-----------------------|-----------------------|-----------------------|-----------------------|-----------------------|-------------------------------------------------------------------------------------------------------------|
| There is none - The analysis does not come from the presented results or it does not point to conclusive remarks | <input type="radio"/> | The analysis is performed from the results and the bibliography - They point directly to conclusive remarks |

## Conclusions

### 21. Pertinence \*

Mark only one oval.

|                                                                       | 0                     | 1                     | 2                     | 3                     | 4                     | 5                     |                                                                                                                                            |
|-----------------------------------------------------------------------|-----------------------|-----------------------|-----------------------|-----------------------|-----------------------|-----------------------|--------------------------------------------------------------------------------------------------------------------------------------------|
| They are totally comments, truisms, excuses, or personal observations | <input type="radio"/> | Conclusions come from the presented analysis, they are concrete and effectively show how the problem is solved and the objectives attained |

### 22. Clarity \*

Mark only one oval.

|                                                                 | 0                     | 1                     | 2                     | 3                     | 4                     | 5                     |                                                                                       |
|-----------------------------------------------------------------|-----------------------|-----------------------|-----------------------|-----------------------|-----------------------|-----------------------|---------------------------------------------------------------------------------------|
| It is not clear what is being concluded - They are not concrete | <input type="radio"/> | The wording is adequate, they are not redundant and precisely point to the objectives |

## Overall

23. Is the title related with the report's contents? \*

Mark only one oval.

|                                                            | 0                     | 1                     | 2                     | 3                     | 4                     | 5                     |                                                   |
|------------------------------------------------------------|-----------------------|-----------------------|-----------------------|-----------------------|-----------------------|-----------------------|---------------------------------------------------|
| It's not - A keyword is used but its usage seems arbitrary | <input type="radio"/> | The title clearly points to the report's contents |

24. General opinion \*

Mark only one oval.

|                      | 0                     | 1                     | 2                     | 3                     | 4                     | 5                     | 6                     | 7                     | 8                     | 9                     | 10                    |                                        |
|----------------------|-----------------------|-----------------------|-----------------------|-----------------------|-----------------------|-----------------------|-----------------------|-----------------------|-----------------------|-----------------------|-----------------------|----------------------------------------|
| It is a lousy report | <input type="radio"/> | I think this will be "the best report" |

25. Does the report matches the given template \*

Mark only one oval.

☐ True

☐ False

26. Does the report needs rewording or has spelling mistakes? \*

Mark only one oval.

☐ True

☐ False

27. I think this report incurs in an academic fault \*

Mark only one oval.

☐ True

☐ False

28. Comments - How can this report be improved? \*

---

---

---

---

---
